# Supplementary material for: Lignin-Based Carbon Nanofibers as Electrodes for Vanadium Redox Couple Electrochemistry
Source: PubMed Central journal article supplement (PMC6359536; doi:10.3390/nano9010106), 2019-01-16
Supplement: nanomaterials-09-00106-s001.pdf [file nanomaterials-09-00106-s001.pdf]

Supplementary

# Lignin-Based Carbon Nanofibers as Electrodes for Vanadium Redox Couple Electrochemistry

Jose Francisco Vivo-Vilches <sup>a,\*</sup>, Alain Celzard <sup>b</sup>, Vanessa Fierro <sup>b</sup>, Isabelle Devin-Ziegler <sup>c</sup>, Nicolas Brosse <sup>c</sup>, Anthony Dufour <sup>d</sup> and Mathieu Etienne <sup>a,\*</sup>

<sup>a</sup> Laboratoire de Chimie Physique et Microbiologie pour les Matériaux et l'Environnement, UMR 7564 CNRS and Université de Lorraine, F-54600 Villers-lès-Nancy, France

<sup>b</sup> Institut Jean Lamour, UMR 7198 CNRS and Université de Lorraine, F-88000 Épinal, France; alain.celzard@univ-lorraine.fr (A.C.); vanessa.fierro@univ-lorraine.fr (V.F.)

<sup>c</sup> Laboratoire d'Etude et de Recherche sur le MAteriau Bois (LERMAB), Université de Lorraine – Campus Aiguillettes, F-54506 Vandœuvre-lès-Nancy, France; isabelle.ziegler@univ-lorraine.fr (I.Z.); nicolas.brosse@univ-lorraine.fr (N.B.)

<sup>d</sup> Laboratoire Réactions et Génie des Procédés, UMR 7274 CNRS and Université de Lorraine, F-54000 Nancy, France; anthony.dufour@univ-lorraine.fr

\* Correspondence: jose.vivo-vilches@univ-lorraine.fr (J.F.V.-V.); mathieu.etienne@univ-lorraine.fr (M.E.); Tel: +33-03-727-474-00 (J.F.V.-V. & M.E.); Fax: +33-03-832-754-44 (J.F.V.-V. & M.E.)

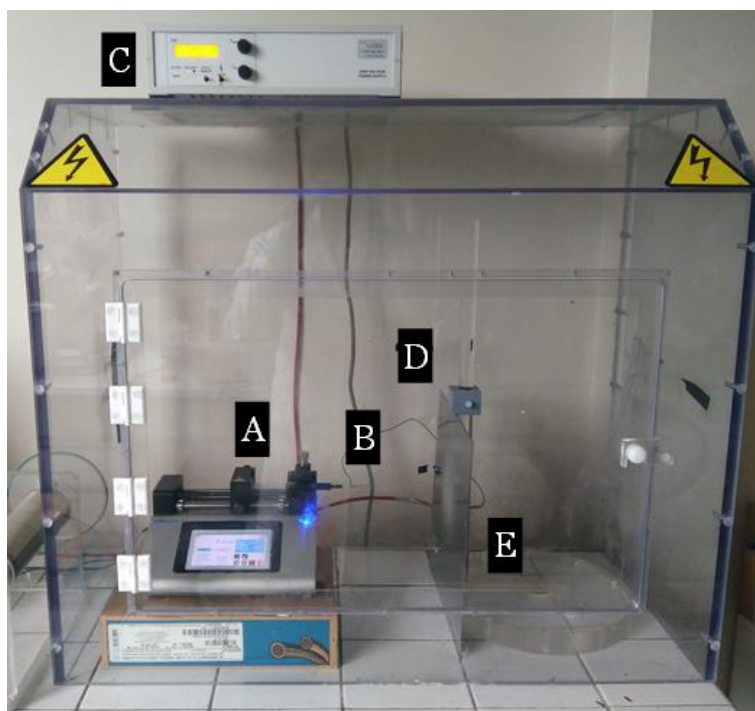

**Figure S1.** Electrospinning set-up: (A) syringe loaded with solution; (B) needle; (C) high voltage supply; (D) collector; (E) fibers.

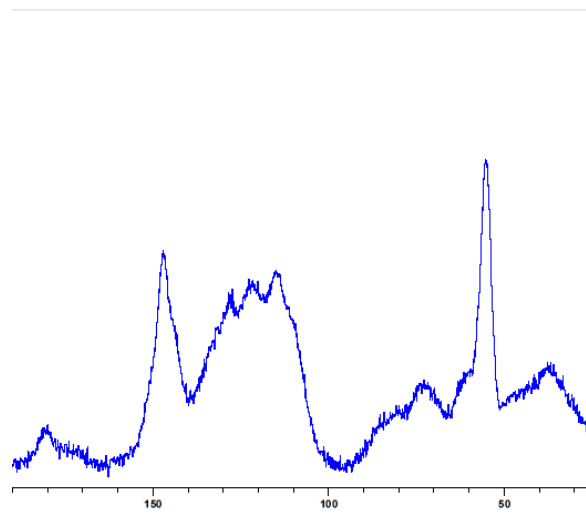

(A)

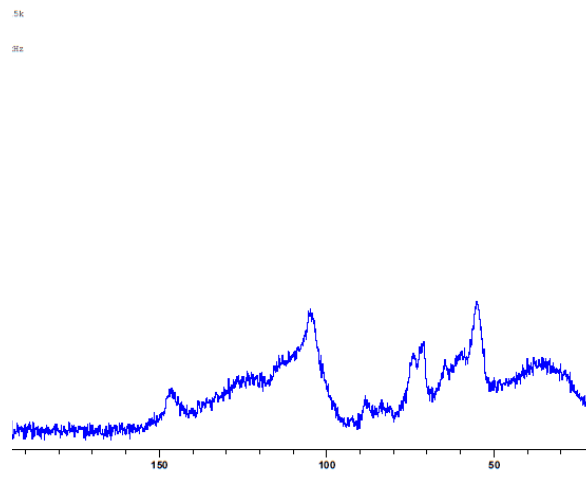

(B)

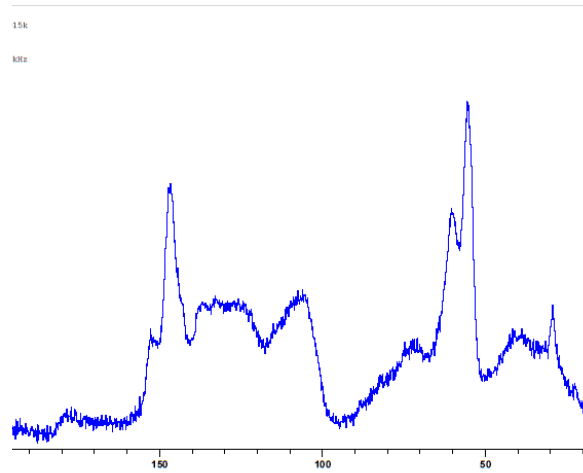

(C)

**Figure S2.**  $^{13}\text{C}$  Solid State NMR spectra of lignins: (A) EOL; (B) KL; and (C) PL.

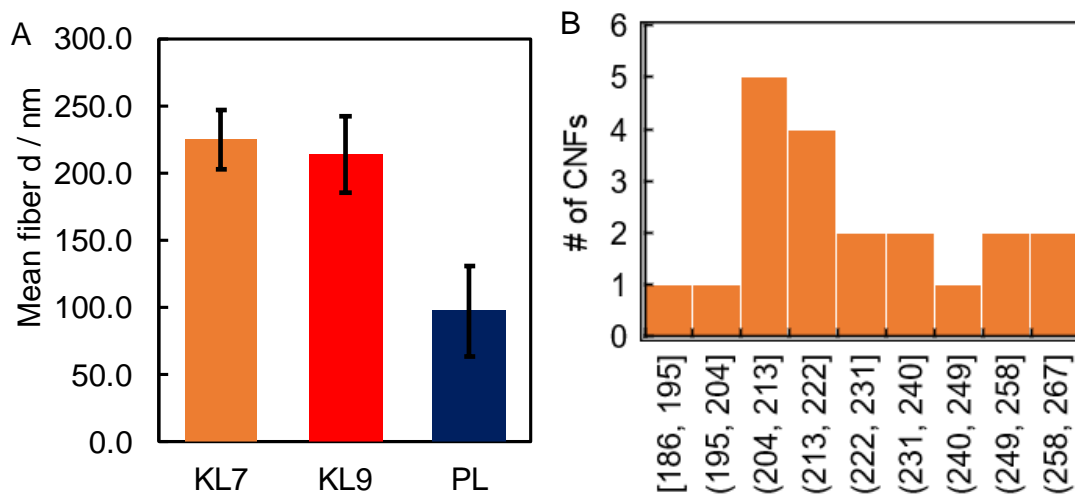

**Figure S3.** (A) Average fiber diameter and standard deviation obtained from the analysis of SEM images; (B) histogram of fiber diameter distribution for sample KL7.

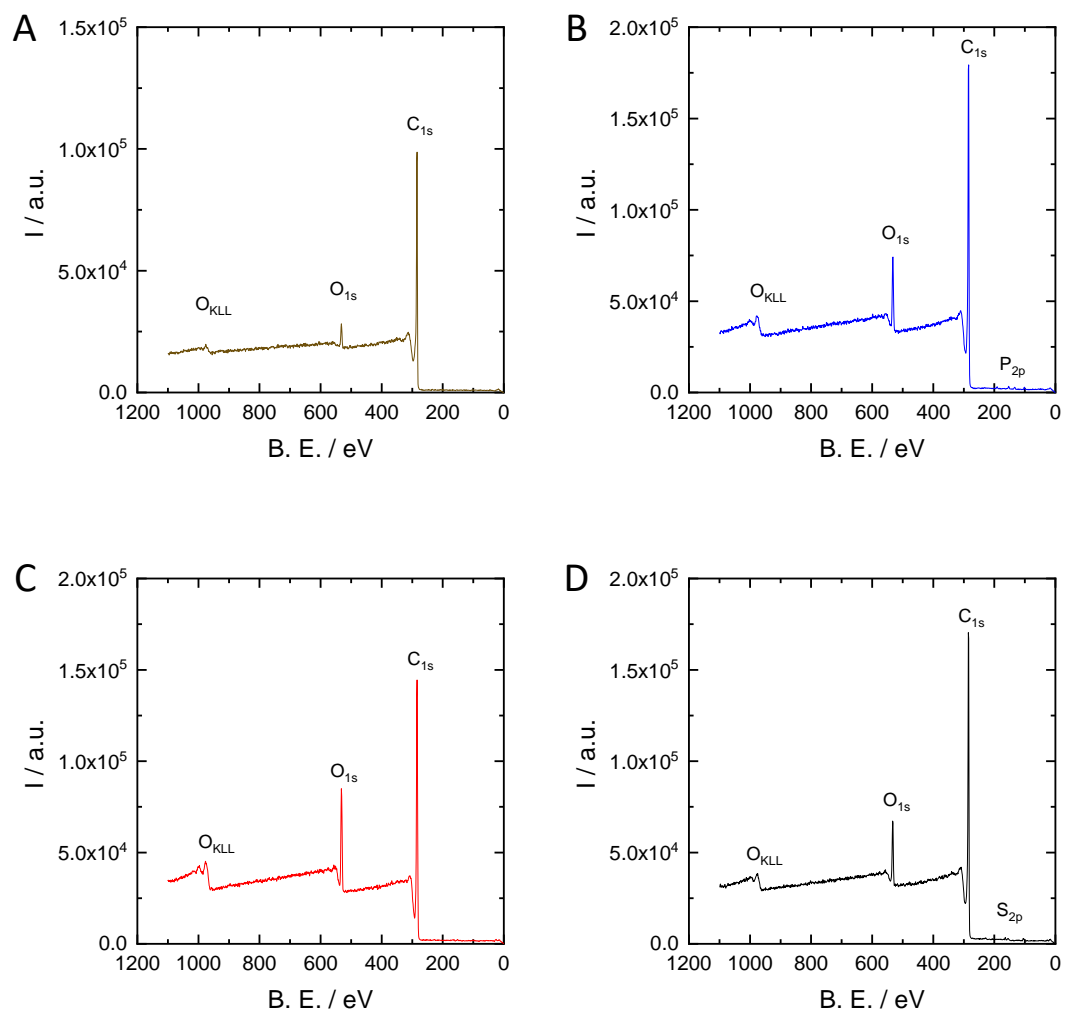

**Figure S4.** XPS survey spectra for CNFs obtained from: (A) EOL; (B) PL; (C) KL; (D) KL loaded with KB.
